# Supplementary material for: Insulin Resistance Is Associated with Reduced Food Odor Sensitivity across a Wide Range of Body Weights
Source: PubMed Central journal article supplement (PMC7468861; doi:10.3390/nu12082201), 2020-07-24
Supplement: nutrients-12-02201-s001.pdf [file nutrients-12-02201-s001.pdf]

## Supplementary

### Figure S1

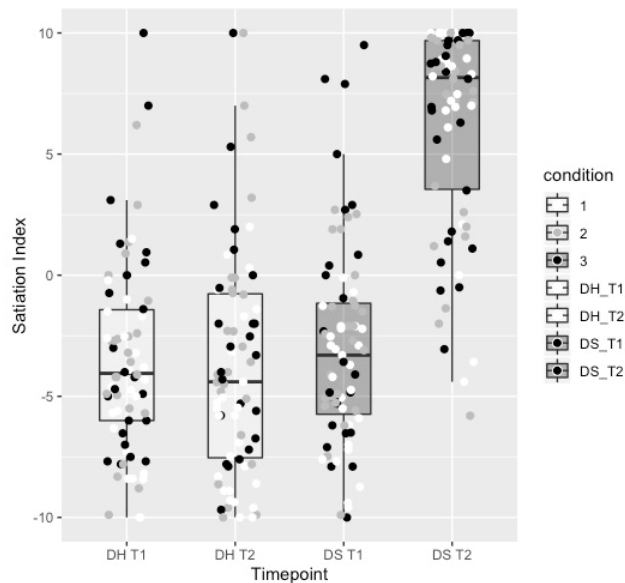

Figure S1 Sanitary Check: Subjective hunger depicted by visual analogue ratings. A satiation index was computed by subtracting hunger ratings from fullness ratings at each time point of internal state ratings on visual analog scales (Sun et al., 2016). A high positive index can be interpreted as very satiated and a high negative index as very hungry. Because of heterogeneous variances, a Wilcoxon test was performed with satiety index pre- and postprandial under two conditions (day hunger vs. day satiated). The Wilcoxon Signed-Ranks Test indicated for the satiated condition significantly higher median post-test than the median pre-test scores ( $Z=-7.292$ ,  $p<.001$ ), whereas it was the other way around for the hungry condition ( $Z=-2.304$ ,  $p=.021$ ). Thus, as expected, participants felt satiated after meal in the satiated condition and perceived more hunger or less fullness in the hungry condition after the break without a meal.

### Figure S2

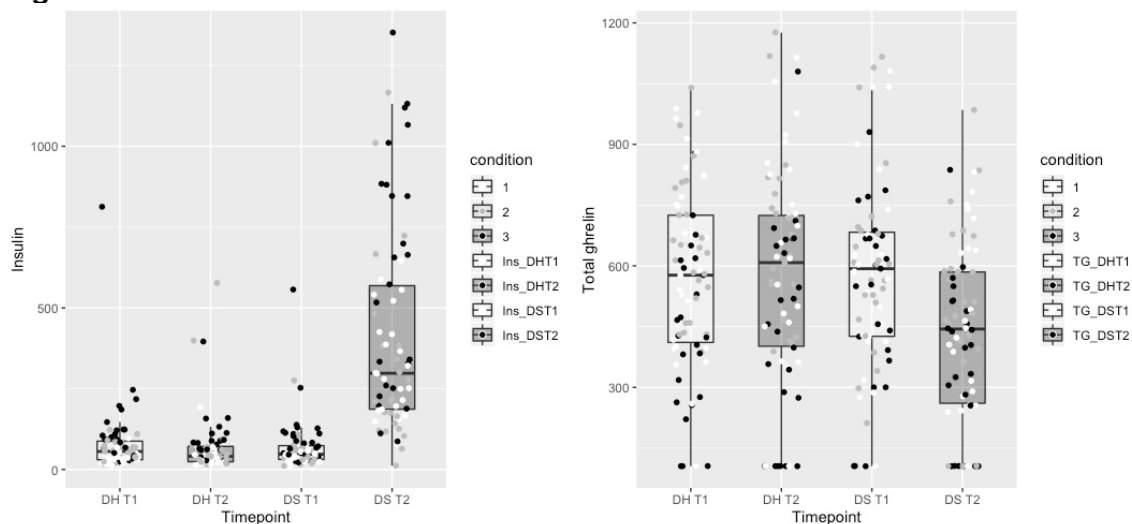

Figure S2 Sanitary Check: Physiological hunger depicted by pre- and postprandial insulin and ghrelin levels. Wilcoxon Signed Ranks test over all groups for insulin and total ghrelin levels before and after meal at both test days as proxies of depicting physiological hunger. As expected we could show a significant increase of insulin levels in the satiated condition after meal intake ( $Z=-6.931$ ,  $p<.001$ ) and no change of insulin levels in the hungry condition ( $Z=-1.447$ ,  $p=.148$ ). As expected total ghrelin levels decreased in the satiated condition after meal intake ( $Z=-4.851$ ,  $p<.001$ ) and did not change in the hungry condition ( $Z=-1.686$ ,  $p=.092$ ).

**Table S1** Olfactory sensitivity and sex/cycle phase in women

|             | Male         | Female       | Menstrual cycle phase (in women) |                            |
|-------------|--------------|--------------|----------------------------------|----------------------------|
|             |              |              | Luteal phase<br>(n=15)           | Follicular phase<br>(n=22) |
| Average ODT | 8.31 ± 1.13  | 8.93 ± 1.27  | 8.77 ± 1.52                      | 9.04 ± 1.09                |
|             | 5.33 – 10.17 | 4.89 – 10.89 | 4.89 – 10.89                     | 6.50 – 10.83               |

**Table S2** Hormonal parameters in weight groups and correlation with BMI

|                                                                | Group level                                    |                                             |                                               | Test                             | sig             | Correlation analysis |                 |
|----------------------------------------------------------------|------------------------------------------------|---------------------------------------------|-----------------------------------------------|----------------------------------|-----------------|----------------------|-----------------|
|                                                                | NW                                             | OW                                          | OB                                            |                                  |                 | Corr.<br>with BMI    | sig             |
| Insulin                                                        | 37.01 ±<br>16.96<br>(10.60 –<br>86.95)         | 54.85 ±<br>24.74<br>(18.85 –<br>108.80)     | 89.34 ±<br>42.60<br>(25.10 –<br>179.90)       | ANOVA<br>F =<br>19.122/df=2      | <i>p</i> < .001 | .619**               | <i>p</i> < .001 |
| <i>Post hoc: (Tukey) NW+OB (p&lt;.001); OW+OB (p=.001)</i>     |                                                |                                             |                                               |                                  |                 |                      |                 |
| IR                                                             | .74 ± .30<br>(.44 –<br>1.66)                   | 1.06 ±<br>.45 (.45 –<br>2.04)               | 1.67 ±<br>.78 (.48<br>– 3.32)                 | K-W H test<br>F =<br>24.228/df=2 | <i>p</i> < .001 | .601**               | <i>p</i> < .001 |
| Leptin                                                         | 6.19<br>±3.92<br>(1.20 –<br>15.00)             | 10.88 ±<br>10.04<br>(.80 –<br>33.20)        | 18.61 ±<br>15.02<br>(3.80 –<br>52.20)         | ANOVA<br>F =<br>24.76/df=2       | <i>p</i> < .001 | .476**               | <i>p</i> < .001 |
| <i>Post hoc: (Games Howell, covariate: sex) NW+OB (p=.005)</i> |                                                |                                             |                                               |                                  |                 |                      |                 |
| Total<br>ghrelin                                               | 604.35 ±<br>238.32<br>(182.75<br>–<br>1035.00) | 626.46 ±<br>186.43<br>(366.50 –<br>1078.00) | 478.75 ±<br>204.12<br>(105.50<br>–<br>903.50) | ANOVA<br>F =<br>3.474/df=2       | <i>p</i> = .036 | -.226*               | <i>p</i> = .026 |
| <i>Post hoc: (Tukey) OW + OB (p=.030)</i>                      |                                                |                                             |                                               |                                  |                 |                      |                 |
| AG                                                             | 11.62 ±<br>7.06<br>(1.71 –<br>25.68)           | 13.85 ±<br>9.98<br>(2.27 –<br>45.14)        | 15.05 ±<br>16.63<br>(1.00 –<br>59.66)         | ANOVA<br>F =<br>.526/df=2        | <i>p</i> = .593 | .037                 | <i>p</i> = .760 |
| UAG                                                            | 21.40 ±<br>16.25<br>(2.71 –<br>58.48)          | 16.22 ±<br>8.67<br>(3.27 –<br>38.27)        | 19.75 ±<br>11.21<br>(3.00 –<br>41.20)         | ANOVA<br>F =<br>1.126/df=2       | <i>p</i> = .330 | -.004                | <i>p</i> = .973 |
| AG/UAG<br>ratio                                                | 1.24 ±<br>1.51 (.03<br>– 5.92)                 | 1.48 ±<br>1.52 (.10<br>– 5.78)              | 1.25 ±<br>1.40 (.03<br>– 4.90)                | ANOVA                            | <i>p</i> = .818 | .012                 | <i>p</i> = .923 |

F =  
.202/df=2

**Table S3** Mediation analysis. Relationship between BMI and olfaction via hormonal parameters

|                                                                        | Estimate    | SE/MSE | t/F   | p                | R <sup>2</sup> | Lower<br>95% CI | Upper<br>95% CI |
|------------------------------------------------------------------------|-------------|--------|-------|------------------|----------------|-----------------|-----------------|
| <b><i>FOOD ODT general via metabolic state (BMI as x variable)</i></b> |             |        |       |                  |                |                 |                 |
| <u>Path a**</u>                                                        |             |        |       |                  |                |                 |                 |
| M1: IR                                                                 | <b>.61</b>  | .68    | 12.53 | <b>&lt;.001*</b> | .37            |                 |                 |
| M2: Leptin                                                             | <b>.83</b>  | .30    | 48.98 | <b>*</b>         | .70            |                 |                 |
| M3: AG/UAG ratio                                                       | .28         | 1.00   | 1.75  | <b>&lt;.001*</b> | .08            |                 |                 |
| M4: TG                                                                 | <b>.31</b>  | .87    | 2.24  | <b>*</b>         | .09            |                 |                 |
|                                                                        |             |        |       | .1656            |                |                 |                 |
|                                                                        |             |        |       | .0925            |                |                 |                 |
| <u>Path b**</u>                                                        |             |        |       |                  |                |                 |                 |
| <i>Model Summary</i>                                                   | .40         | .94    | 1.64  | .1414            | .16            |                 |                 |
| X: BMI                                                                 | .19         | .20    | .93   | .3560            |                | -.216           | .591            |
| M1: IR                                                                 | <b>-.42</b> | .15    | -2.77 | <b>.0075*</b>    |                | <b>-.717</b>    | <b>-.115</b>    |
| M2: Leptin                                                             | -.06        | .22    | -.29  | <b>*</b>         |                | -.509           | .380            |
| M3: AG/UAG ratio                                                       | -.10        | .12    | -.80  | .7716            |                | -.343           | .148            |
| M4: TG                                                                 | -.20        | .13    | -1.47 | .4312            |                | -.461           | .070            |
| Co1: Sex                                                               | .50         | .36    | 1.37  | .1458            |                | -.229           | 1.221           |
|                                                                        |             |        |       | .1762            |                |                 |                 |
| <u>Total effect</u>                                                    | -.09        | .13    | -.70  | .4870            |                | -.348           | .167            |
| <u>Direct effect</u>                                                   | .19         | .20    | .93   | .3560            |                | -.216           | .591            |
| <u>Indirect effect**</u>                                               |             |        |       |                  |                |                 |                 |
| IR                                                                     | <b>-.26</b> | .10    |       |                  |                | <b>-.496</b>    | <b>-.087</b>    |
| Leptin                                                                 | -.04        | .15    |       |                  |                | -.385           | .220            |
| AG/UAG ratio                                                           | -.02        | .03    |       |                  |                | -.090           | .050            |
| TG                                                                     | .04         | .04    |       |                  |                | -.016           | .130            |
| <b><i>FOOD ODT Change via metabolic state (BMI as x variable)</i></b>  |             |        |       |                  |                |                 |                 |
| <u>Path a**</u>                                                        |             |        |       |                  |                |                 |                 |
| M1: IR                                                                 | <b>.61</b>  | .68    | 12.53 | <b>&lt;.001*</b> | .37            |                 |                 |
| M2: Leptin                                                             | <b>.83</b>  | .30    | 48.98 | <b>*</b>         | .70            |                 |                 |
| M3: AG/UAG ratio                                                       | .28         | 1.00   | 1.75  | <b>&lt;.001*</b> | .08            |                 |                 |
| M4: TG                                                                 | <b>.31</b>  | .87    | 2.24  | <b>*</b>         | .09            |                 |                 |
|                                                                        |             |        |       | .1656            |                |                 |                 |
|                                                                        |             |        |       | .0925            |                |                 |                 |
| <u>Path b**</u>                                                        |             |        |       |                  |                |                 |                 |
| <i>Model Summary</i>                                                   | <b>.52</b>  | 2.32   | 2.32  | <b>.0056*</b>    | .27            |                 |                 |
| X: BMI                                                                 | <b>.71</b>  | .32    | 2.23  | <b>*</b>         |                | <b>.074</b>     | <b>1.340</b>    |
| M1: IR                                                                 | <b>-.72</b> | .24    | -3.06 | <b>.0293*</b>    |                | <b>-1.194</b>   | <b>-.250</b>    |
| M2: Leptin                                                             | <b>-.72</b> | .35    | -2.06 | <b>.0033*</b>    |                | -1.414          | -.019           |
| M3: AG/UAG ratio                                                       | -.27        | .19    | -1.37 | <b>*</b>         |                | -.649           | .109            |
| M4: TG                                                                 | -.53        | .21    | -2.53 | <b>.0443*</b>    |                | -.942           | -.109           |
| Co1: Sex                                                               | <b>1.49</b> | .57    | 2.61  | .1745            |                | <b>.348</b>     | <b>2.621</b>    |
| Co2: Meal ingested                                                     | -.39        | .21    | -1.89 | <b>.0142*</b>    |                | -.803           | .0234           |
|                                                                        |             |        |       | <b>.0114*</b>    |                |                 |                 |
|                                                                        |             |        |       | .0640            |                |                 |                 |
| <u>Total effect</u>                                                    | -.13        | .22    | -.61  | .5471            |                | -.563           | .301            |

|                          |             |     |      |               |              |              |
|--------------------------|-------------|-----|------|---------------|--------------|--------------|
| <u>Direct effect*</u>    | <b>.71</b>  | .32 | 2.23 | <b>.0293*</b> | <b>.074</b>  | <b>1.340</b> |
| <u>Indirect effect**</u> |             |     |      |               |              |              |
| IR                       | <b>-.44</b> | .16 |      |               | <b>-.808</b> | <b>-.190</b> |
| Leptin                   | <b>-.44</b> | .22 |      |               | <b>-.990</b> | <b>.117</b>  |
| AG/UAG ratio             | -.05        | .06 |      |               | -.183        | .046         |
| TG                       | -.10        | .08 |      |               | -.019        | .292         |

---

**Non FOOD ODT general via metabolic state (BMI as x variable)**

---

|                        |            |      |       |                  |     |            |
|------------------------|------------|------|-------|------------------|-----|------------|
| <u>Path a**</u>        |            |      |       |                  |     |            |
| M1: IR                 | <b>.61</b> | .68  | 12.53 | <b>&lt;.001*</b> | .37 |            |
| M2: Leptin             | <b>.83</b> | .30  | 48.98 | *                | .70 |            |
| M3: AG/UAG ratio       | .28        | 1.01 | 1.75  | <b>&lt;.001*</b> | .08 |            |
| M4: TG                 | <b>.31</b> | .87  | 2.24  | *                | .09 |            |
|                        |            |      |       | .1656            |     |            |
|                        |            |      |       | <b>.0435*</b>    |     |            |
| <u>Path b</u>          |            |      |       |                  |     |            |
| <i>Model Summary</i>   | .32        | .99  | .95   | .4777            | .10 |            |
| X: BMI                 | .16        | .21  | .77   | .4431            |     | -.254 .574 |
| M1: IR                 | -.22       | .15  | -1.41 | .1635            |     | -.526 .091 |
| M2: Leptin             | -.02       | .23  | -.09  | .9320            |     | -.475 .436 |
| M3: AG/UAG ratio       | -.11       | .13  | -.89  | .3768            |     | -.364 .140 |
| M4: TG                 | .07        | .14  | .55   | .5839            |     | -.197 .347 |
| Co1: Sex               | .45        | .37  | 1.20  | .2356            |     | -.298 .188 |
| <u>Total effect</u>    | -.02       | .13  | -.16  | .8751            |     | -.273 .233 |
| <u>Direct effect</u>   | .16        | .21  | .77   | .4431            |     | -.254 .574 |
| <u>Indirect effect</u> |            |      |       |                  |     |            |
| IR                     | -.13       | .09  |       |                  |     | -.331 .030 |
| Leptin                 | -.01       | .15  |       |                  |     | -.287 .309 |
| AG/UAG ratio           | -.02       | .03  |       |                  |     | -.099 .043 |
| TG                     | -.01       | .03  |       |                  |     | -.080 .037 |

---

**Non FOOD ODT Change via metabolic state (BMI as x variable)**

---

|                        |            |      |       |                  |     |             |
|------------------------|------------|------|-------|------------------|-----|-------------|
| <u>Path a**</u>        |            |      |       |                  |     |             |
| M1: IR                 | <b>.61</b> | .68  | 12.53 | <b>&lt;.001*</b> | .37 |             |
| M2: Leptin             | <b>.83</b> | .30  | 48.98 | *                | .70 |             |
| M3: AG/UAG ratio       | .28        | 1.01 | 1.75  | <b>&lt;.001*</b> | .08 |             |
| M4: TG                 | <b>.31</b> | .87  | 2.24  | *                | .09 |             |
|                        |            |      |       | .1656            |     |             |
|                        |            |      |       | <b>.0435*</b>    |     |             |
| <u>Path b</u>          |            |      |       |                  |     |             |
| <i>Model Summary</i>   | .29        | 3.23 | .80   | .5915            | .09 |             |
| X: BMI                 | .47        | .37  | 1.25  | .2177            |     | -.282 1.213 |
| M1: IR                 | -.30       | .28  | -1.08 | .2836            |     | -.859 .256  |
| M2: Leptin             | -.64       | .41  | -1.56 | .1248            |     | -1.463 .183 |
| M3: AG/UAG ratio       | .13        | .23  | .56   | .5766            |     | -.327 .582  |
| M4: TG                 | .10        | .25  | .42   | .6736            |     | -.387 .695  |
| Co1: Sex               | .86        | .67  | 1.29  | .2029            |     | -.478 2.201 |
| Co2: Meal ingested     | -.15       | .24  | -.63  | .5332            |     | -.640 .335  |
| <u>Total effect</u>    | -.11       | .23  | -.476 | .6359            |     | -.571 .352  |
| <u>Direct effect</u>   | .47        | .37  | 1.25  | .2177            |     | -.282 1.213 |
| <u>Indirect effect</u> |            |      |       |                  |     |             |
| IR                     | -.19       | .17  |       |                  |     | -.541 .123  |

|              |      |     |  |  |        |      |
|--------------|------|-----|--|--|--------|------|
| Leptin       | -.39 | .32 |  |  | -1.061 | .214 |
| AG/UAG ratio | .02  | .08 |  |  | -.135  | .208 |
| TG           | -.02 | .06 |  |  | -.156  | .088 |

**FOOD ODT**  
**general via**  
**metabolic state**  
**(WHR as x**  
**variable)**

---

|                  |            |      |       |                  |       |  |
|------------------|------------|------|-------|------------------|-------|--|
| <u>Path a**</u>  |            |      |       |                  |       |  |
| M1: IR           | <b>.61</b> | .68  | 12.53 | <b>&lt;.001*</b> | .37   |  |
| M2: Leptin       | <b>.83</b> | .30  | 48.98 | *                | .70   |  |
| M3: AG/UAG ratio | .28        | 1.00 | 1.75  | <b>&lt;.001*</b> | .08   |  |
| M4: TG           | <b>.31</b> | .87  | 2.24  | *                | .09   |  |
|                  |            |      |       |                  | .1656 |  |
|                  |            |      |       |                  | .0925 |  |

---

|                      |             |     |       |               |     |                           |
|----------------------|-------------|-----|-------|---------------|-----|---------------------------|
| <u>Path b**</u>      |             |     |       |               |     |                           |
| <i>Model Summary</i> | .40         | .94 | 1.64  | .1414         | .16 |                           |
| X: BMI               | .19         | .20 | .93   | .3560         |     | -.216 .591                |
| M1: IR               | <b>-.42</b> | .15 | -2.77 | <b>.0075*</b> |     | <b>-.717</b> <b>-.115</b> |
| M2: Leptin           | -.06        | .22 | -.29  | *             |     | -.509 .380                |
| M3: AG/UAG ratio     | -.10        | .12 | -.80  | .7716         |     | -.343 .148                |
| M4: TG               | -.20        | .13 | -1.47 | .4312         |     | -.461 .070                |
| Co1: Sex             | .50         | .36 | 1.37  | .1458         |     | -.229 1.221               |
|                      |             |     |       | .1762         |     |                           |

---

|                     |      |     |      |       |  |            |
|---------------------|------|-----|------|-------|--|------------|
| <u>Total effect</u> | -.09 | .13 | -.70 | .4870 |  | -.348 .167 |
|---------------------|------|-----|------|-------|--|------------|

---

|                      |     |     |     |       |  |            |
|----------------------|-----|-----|-----|-------|--|------------|
| <u>Direct effect</u> | .19 | .20 | .93 | .3560 |  | -.216 .591 |
|----------------------|-----|-----|-----|-------|--|------------|

---

|                          |             |     |  |  |  |                           |
|--------------------------|-------------|-----|--|--|--|---------------------------|
| <u>Indirect effect**</u> |             |     |  |  |  |                           |
| IR                       | <b>-.26</b> | .10 |  |  |  | <b>-.496</b> <b>-.087</b> |
| Leptin                   | -.04        | .15 |  |  |  | -.385 .220                |
| AG/UAG ratio             | -.02        | .03 |  |  |  | -.090 .050                |
| TG                       | .04         | .04 |  |  |  | -.016 .130                |

**FOOD ODT**  
**Change via**  
**metabolic state**  
**(WHR as x**  
**variable)**

---

|                  |            |      |       |                  |       |  |
|------------------|------------|------|-------|------------------|-------|--|
| <u>Path a**</u>  |            |      |       |                  |       |  |
| M1: IR           | <b>.61</b> | .68  | 12.53 | <b>&lt;.001*</b> | .37   |  |
| M2: Leptin       | <b>.83</b> | .30  | 48.98 | *                | .70   |  |
| M3: AG/UAG ratio | .28        | 1.00 | 1.75  | <b>&lt;.001*</b> | .08   |  |
| M4: TG           | <b>.31</b> | .87  | 2.24  | *                | .09   |  |
|                  |            |      |       |                  | .1656 |  |
|                  |            |      |       |                  | .0925 |  |

---

|                      |             |      |       |               |     |                            |
|----------------------|-------------|------|-------|---------------|-----|----------------------------|
| <u>Path b**</u>      |             |      |       |               |     |                            |
| <i>Model Summary</i> | <b>.52</b>  | 2.32 | 2.32  | <b>.0056*</b> | .27 |                            |
| X: BMI               | <b>.71</b>  | .32  | 2.23  | *             |     | <b>.074</b> <b>1.340</b>   |
| M1: IR               | <b>-.72</b> | .24  | -3.06 | <b>.0293*</b> |     | <b>-1.194</b> <b>-.250</b> |
| M2: Leptin           | <b>-.72</b> | .35  | -2.06 | <b>.0033*</b> |     | -1.414 -.019               |
| M3: AG/UAG ratio     | -.27        | .19  | -1.37 | *             |     | -.649 .109                 |
| M4: TG               | -.53        | .21  | -2.53 | <b>.0443*</b> |     | -.942 -.109                |
| Co1: Sex             | <b>1.49</b> | .57  | 2.61  | .1745         |     | <b>.348</b> <b>2.621</b>   |
| Co2: Meal ingested   | -.39        | .21  | -1.89 | <b>.0142*</b> |     | -.803 .0234                |
|                      |             |      |       | <b>.0114*</b> |     |                            |
|                      |             |      |       | .0640         |     |                            |

---

|                     |      |     |      |       |  |            |
|---------------------|------|-----|------|-------|--|------------|
| <u>Total effect</u> | -.13 | .22 | -.61 | .5471 |  | -.563 .301 |
|---------------------|------|-----|------|-------|--|------------|

---

|                       |            |     |      |               |  |                          |
|-----------------------|------------|-----|------|---------------|--|--------------------------|
| <u>Direct effect*</u> | <b>.71</b> | .32 | 2.23 | <b>.0293*</b> |  | <b>.074</b> <b>1.340</b> |
|-----------------------|------------|-----|------|---------------|--|--------------------------|

---

|                          |             |     |  |              |              |
|--------------------------|-------------|-----|--|--------------|--------------|
| <u>Indirect effect**</u> |             |     |  |              |              |
| IR                       | <b>-.44</b> | .16 |  | <b>-.808</b> | <b>-.190</b> |
| Leptin                   | <b>-.44</b> | .22 |  | <b>-.990</b> | <b>.117</b>  |
| AG/UAG ratio             | -.05        | .06 |  | -.183        | .046         |
| TG                       | -.10        | .08 |  | -.019        | .292         |

---

**Non FOOD ODT  
general via  
metabolic state  
(WHR as x  
variable)**

---

Path a\*\*

|                  |            |      |       |                  |     |
|------------------|------------|------|-------|------------------|-----|
| M1: IR           | <b>.61</b> | .68  | 12.53 | <b>&lt;.001*</b> | .37 |
| M2: Leptin       | <b>.83</b> | .30  | 48.98 | *                | .70 |
| M3: AG/UAG ratio | .28        | 1.01 | 1.75  | <b>&lt;.001*</b> | .08 |
| M4: TG           | <b>.31</b> | .87  | 2.24  | *                | .09 |
|                  |            |      |       | .1656            |     |
|                  |            |      |       | <b>.0435*</b>    |     |

---

Path b

|                      |      |     |       |       |     |            |
|----------------------|------|-----|-------|-------|-----|------------|
| <i>Model Summary</i> | .32  | .99 | .95   | .4777 | .10 |            |
| X: BMI               | .16  | .21 | .77   | .4431 |     | -.254 .574 |
| M1: IR               | -.22 | .15 | -1.41 | .1635 |     | -.526 .091 |
| M2: Leptin           | -.02 | .23 | -.09  | .9320 |     | -.475 .436 |
| M3: AG/UAG ratio     | -.11 | .13 | -.89  | .3768 |     | -.364 .140 |
| M4: TG               | .07  | .14 | .55   | .5839 |     | -.197 .347 |
| Co1: Sex             | .45  | .37 | 1.20  | .2356 |     | -.298 .188 |

---

|                     |      |     |      |       |  |            |
|---------------------|------|-----|------|-------|--|------------|
| <u>Total effect</u> | -.02 | .13 | -.16 | .8751 |  | -.273 .233 |
|---------------------|------|-----|------|-------|--|------------|

---

|                      |     |     |     |       |  |            |
|----------------------|-----|-----|-----|-------|--|------------|
| <u>Direct effect</u> | .16 | .21 | .77 | .4431 |  | -.254 .574 |
|----------------------|-----|-----|-----|-------|--|------------|

---

Indirect effect

|              |      |     |  |  |  |            |
|--------------|------|-----|--|--|--|------------|
| IR           | -.13 | .09 |  |  |  | -.331 .030 |
| Leptin       | -.01 | .15 |  |  |  | -.287 .309 |
| AG/UAG ratio | -.02 | .03 |  |  |  | -.099 .043 |
| TG           | -.01 | .03 |  |  |  | -.080 .037 |

---

**Non FOOD ODT  
Change via  
metabolic state  
(WHR as x  
variable)**

---

Path a\*\*

|                  |            |      |       |                  |     |
|------------------|------------|------|-------|------------------|-----|
| M1: IR           | <b>.61</b> | .68  | 12.53 | <b>&lt;.001*</b> | .37 |
| M2: Leptin       | <b>.83</b> | .30  | 48.98 | *                | .70 |
| M3: AG/UAG ratio | .28        | 1.01 | 1.75  | <b>&lt;.001*</b> | .08 |
| M4: TG           | <b>.31</b> | .87  | 2.24  | *                | .09 |
|                  |            |      |       | .1656            |     |
|                  |            |      |       | <b>.0435*</b>    |     |

---

Path b

|                      |      |      |       |       |     |             |
|----------------------|------|------|-------|-------|-----|-------------|
| <i>Model Summary</i> | .29  | 3.23 | .80   | .5915 | .09 |             |
| X: BMI               | .47  | .37  | 1.25  | .2177 |     | -.282 1.213 |
| M1: IR               | -.30 | .28  | -1.08 | .2836 |     | -.859 .256  |
| M2: Leptin           | -.64 | .41  | -1.56 | .1248 |     | -1.463 .183 |
| M3: AG/UAG ratio     | .13  | .23  | .56   | .5766 |     | -.327 .582  |
| M4: TG               | .10  | .25  | .42   | .6736 |     | -.387 .695  |
| Co1: Sex             | .86  | .67  | 1.29  | .2029 |     | -.478 2.201 |
| Co2: Meal ingested   | -.15 | .24  | -.63  | .5332 |     | -.640 .335  |

---

|                        |      |     |       |       |        |       |
|------------------------|------|-----|-------|-------|--------|-------|
| <u>Total effect</u>    | -.11 | .23 | -.476 | .6359 | -.571  | .352  |
| <u>Direct effect</u>   | .47  | .37 | 1.25  | .2177 | -.282  | 1.213 |
| <u>Indirect effect</u> |      |     |       |       |        |       |
| IR                     | -.19 | .17 |       |       | -.541  | .123  |
| Leptin                 | -.39 | .32 |       |       | -1.061 | .214  |
| AG/UAG ratio           | .02  | .08 |       |       | -.135  | .208  |
| TG                     | -.02 | .06 |       |       | -.156  | .088  |

**Table S4:** Overview: Olfactory sensitivity between participants with normal weight and obesity for age and BMI.

| Study                          | Normal weight group |               |               | Obese group |               |               | Finding                                       | Comment                                          |
|--------------------------------|---------------------|---------------|---------------|-------------|---------------|---------------|-----------------------------------------------|--------------------------------------------------|
|                                | N                   | Age           | BMI           | n           | Age           | BMI           |                                               |                                                  |
| <b>Fernandez-Garcia (2017)</b> | 77                  | 27.1<br>±7.3  | 21.6<br>±1.7  | 28          | 46.4<br>±12.2 | 35.2<br>±2.6  | Lower ODT<br>(n-butanol)                      |                                                  |
| <b>Fernandez-Aranda (2016)</b> | 36                  | 37.3<br>±5.9  | 22.4<br>±2.6  | 59          | 37.5<br>±8.7  | 42.7<br>±6.6  | Lower ODT<br>(n-butanol)                      |                                                  |
| <b>Pastor (2016)</b>           | 70                  | 27.4<br>±7.36 | 21.7<br>±1.62 | 26          | 47.3<br>±11.1 | 35.5<br>±2.53 | Lower ODT<br>(n-butanol)                      |                                                  |
| <b>Stafford (2015)</b>         | 20                  | 19.4<br>±.3   | 20.3          | 20          | 20.4<br>±.4   | 31.3<br>±.3   | Higher ODT<br>(chocolate)                     |                                                  |
| <b>Skrandies (2015)</b>        |                     |               |               | 7           | 35.5          | 34.4          | Lower ODT<br>in higher<br>BMI<br>participants | Compared to<br>underweight<br>& normal<br>weight |
